# Supplementary material for: Flavivirus Cross-Reactivity to Dengue Nonstructural Protein 1 Antigen Detection Assays
Source: PubMed Central journal article supplement (PMC7167843; doi:10.3390/diagnostics10010011), 2019-12-24
Supplement: diagnostics-10-00011-s001.pdf [file diagnostics-10-00011-s001.pdf]

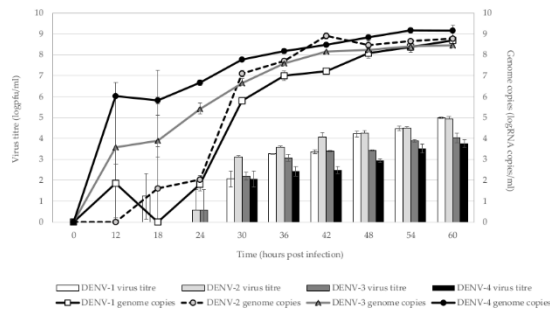

Figure S1. Growth kinetics of DENV serotypes.

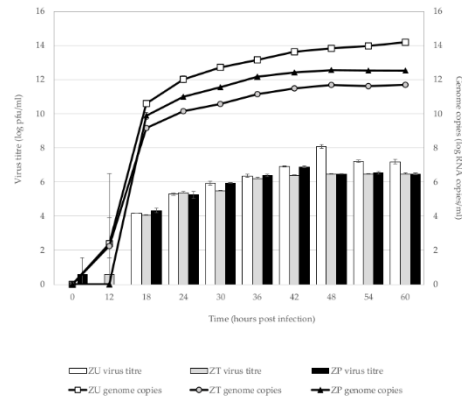

Figure S2: Growth kinetics of ZIKV.

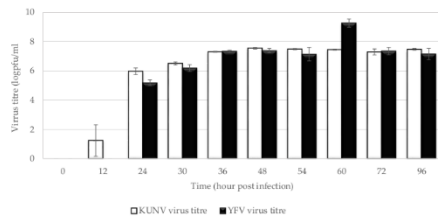

Figure S3: Growth kinetics of KUNV and YFV. Figure S4: Predicted NS1 epitopes potentially targeted by antibodies used in commercial assays.

Table S1: Cross-reactive titres of Zika virus (ZIKV) for dengue NS1 Ag detection assays.

| Virus strain       | Dengue NS1 Ag Rapid assays                |                                           |                                                   | Dengue NS1 Ag ELISA assays                        |              |
|--------------------|-------------------------------------------|-------------------------------------------|---------------------------------------------------|---------------------------------------------------|--------------|
|                    | SD BIOLINE Dengue NS1 Ag rapid test       | Panbio Dengue Early Rapid                 | Biorad Dengue NS1 Ag STRIP                        | SD Dengue NS1 Ag ELISA                            | PanBio ELISA |
| ZIKV Uganda (ZU)   | Reactive<br>6.36 ± 0.08<br>(13.15 ± 0.01) | Reactive<br>6.92 ± 0.04<br>(13.62 ± 0.03) | Non-reactive<br>≤ 7.21 ± 0.08<br>(≤ 13.97 ± 0.13) | Non-reactive<br>≤ 7.21 ± 0.12<br>(≤ 13.97 ± 0.13) |              |
| ZIKV Thailand (ZT) | Reactive<br>6.21 ± 0.06<br>(11.14 ± 0.06) | Reactive<br>6.37 ± 0.06<br>(11.48 ± 0.04) | Non-reactive<br>≤ 6.46 ± 0.02<br>(≤ 11.61 ± 0.04) | Non-reactive<br>≤ 6.46 ± 0.02<br>(≤ 11.61 ± 0.04) |              |

|                       |                                                     |                                                     |                                                                   |                                                                   |
|-----------------------|-----------------------------------------------------|-----------------------------------------------------|-------------------------------------------------------------------|-------------------------------------------------------------------|
| ZIKV Puerto Rico (ZP) | Reactive<br>$6.38 \pm 0.07$<br>( $12.17 \pm 0.03$ ) | Reactive<br>$6.88 \pm 0.06$<br>( $12.41 \pm 0.06$ ) | Non-reactive<br>$\leq 6.52 \pm 0.08$<br>( $\leq 12.52 \pm 0.05$ ) | Non-reactive<br>$\leq 6.52 \pm 0.08$<br>( $\leq 12.52 \pm 0.05$ ) |
|-----------------------|-----------------------------------------------------|-----------------------------------------------------|-------------------------------------------------------------------|-------------------------------------------------------------------|

ZIKV culture supernatants were harvested at every 6-12-hours post-infection (h.p.i.) till 60 h.p.i., and tested with DENV NS1 Ag detection assays according to the manufacturers' instructions. The viral load of culture supernatants first tested either positive (reactive) or negative (non-reactive to cultures collected till 60 h.p.i.) in each assay is given. The titres are given in log pfu/mL  $\pm$  standard deviation. Those in brackets are log RNA copy/mL  $\pm$  standard deviation. pfu: plaque forming unit.
